# Supplementary material for: Impact of System and Diagnostic Errors on Medical Litigation Outcomes: Machine Learning-Based Prediction Models
Source: Healthcare (Basel). 2022 May 12;10(5):892. doi: 10.3390/healthcare10050892 (PMC9140545; doi:10.3390/healthcare10050892)
Supplement: Supplementary file 1 [file healthcare-10-00892-s001.zip › healthcare-1714408-supplementary.pdf]

**Supplemental Table S1.** Machine learning and logistic model-based prediction models for litigation outcomes in surgical patients.

|           | LightGBM            | Decision Tree       | Random Forest       | Logistic Model      |
|-----------|---------------------|---------------------|---------------------|---------------------|
| Accuracy  | 0.835 (0.796–0.875) | 0.869 (0.827–0.912) | 0.868 (0.824–0.911) | 0.887 (0.860–0.914) |
| Precision | 0.838 (0.793–0.883) | 0.845 (0.802–0.888) | 0.831 (0.786–0.875) | 0.876 (0.835–0.917) |
| Recall    | 0.880 (0.840–0.920) | 0.942 (0.911–0.972) | 0.963 (0.934–0.992) | 0.931 (0.902–0.960) |
| F1 score  | 0.857 (0.824–0.890) | 0.890 (0.856–0.925) | 0.892 (0.856–0.927) | 0.900 (0.879–0.922) |
| AUC       | 0.899 (0.865–0.934) | 0.867 (0.813–0.922) | 0.896 (0.857–0.936) | 0.907 (0.879–0.936) |

The value was described as the predictive ability (95% CI). CI, confidence interval; AUC, area under the curve.

**Supplemental Table S2.** Machine learning and logistic model-based prediction models for litigation outcomes in inpatients.

|           | LightGBM            | Decision Tree       | Random Forest       | Logistic Model      |
|-----------|---------------------|---------------------|---------------------|---------------------|
| Accuracy  | 0.889 (0.853–0.926) | 0.889 (0.861–0.917) | 0.873 (0.845–0.901) | 0.882 (0.847–0.917) |
| Precision | 0.881 (0.850–0.913) | 0.845 (0.811–0.879) | 0.860 (0.832–0.887) | 0.870 (0.827–0.913) |
| Recall    | 0.922 (0.868–0.977) | 0.978 (0.9657–1.00) | 0.918 (0.878–0.958) | 0.931 (0.879–0.983) |
| F1 score  | 0.900 (0.865–0.934) | 0.906 (0.883–0.929) | 0.887 (0.861–0.912) | 0.896 (0.866–0.926) |
| AUC       | 0.921 (0.881–0.961) | 0.908 (0.875–0.941) | 0.925 (0.893–0.957) | 0.916 (0.881–0.851) |

The value was described as the predictive ability (95% CI). CI, confidence interval; AUC, area under the curve.

**Supplemental Table S3.** Machine learning and logistic model-based prediction models for litigation outcomes in outpatients.

|           | LightGBM            | Decision Tree       | Random Forest       | Logistic Model      |
|-----------|---------------------|---------------------|---------------------|---------------------|
| Accuracy  | 0.706 (0.676–0.737) | 0.707 (0.664–0.749) | 0.736 (0.699–0.773) | 0.677 (0.639–0.715) |
| Precision | 0.730 (0.683–0.776) | 0.731 (0.678–0.783) | 0.739 (0.692–0.786) | 0.690 (0.656–0.724) |
| Recall    | 0.729 (0.665–0.794) | 0.724 (0.635–0.814) | 0.795 (0.719–0.871) | 0.720 (0.672–0.767) |
| F1 score  | 0.724 (0.691–0.757) | 0.721 (0.672–0.770) | 0.760 (0.723–0.797) | 0.703 (0.669–0.737) |
| AUC       | 0.765 (0.711–0.818) | 0.705 (0.649–0.760) | 0.814 (0.772–0.855) | 0.753 (0.701–0.806) |

The value was described as the predictive ability (95% CI). CI, confidence interval; AUC, area under the curve.

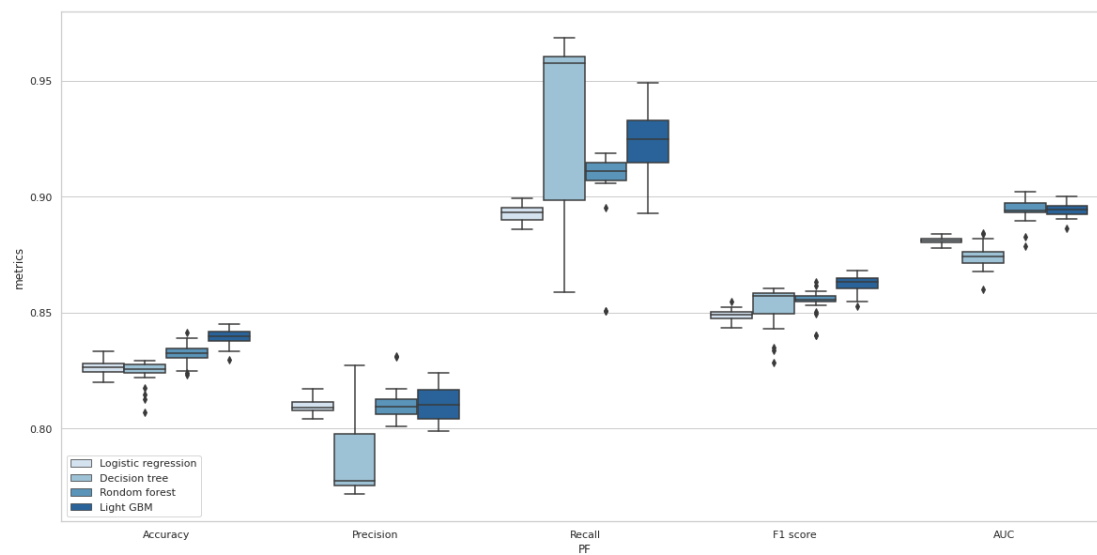

**Figure S1.** Performance metric evaluations of the three machine learning models and a logistic model for all cases.

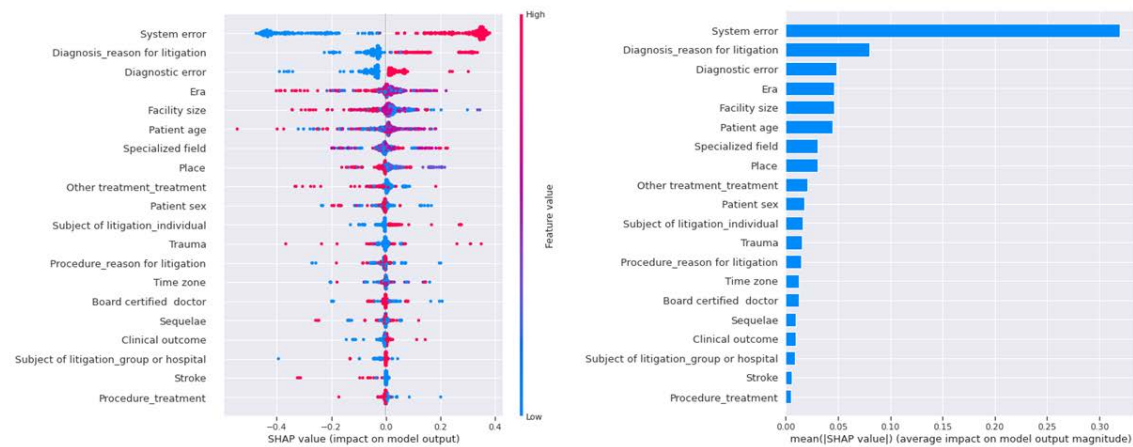

(A)

(B)

**Figure S2.** Feature importance in decision tree with SHAP.

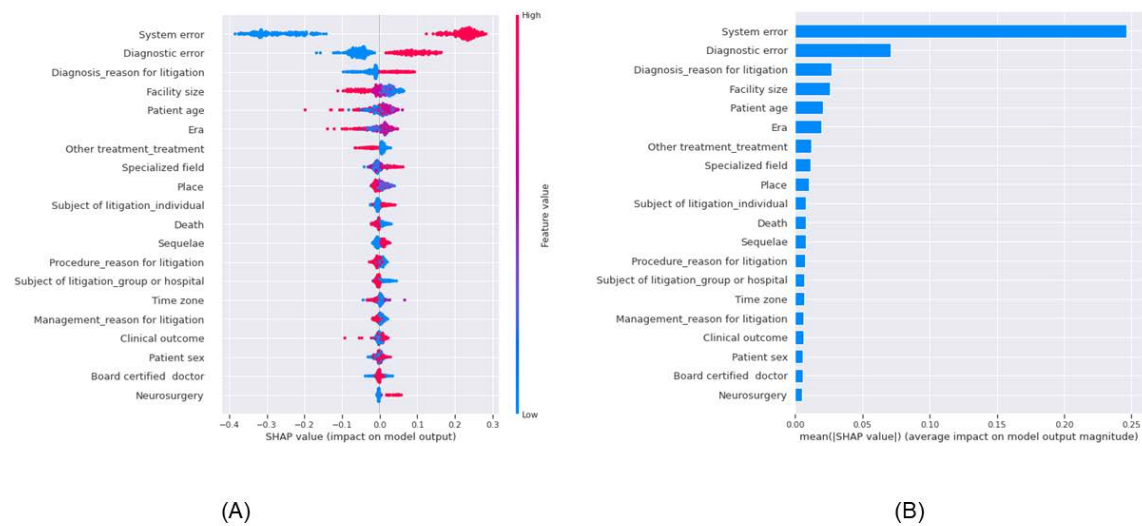

**Figure S3:** Feature importance in random forest with SHAP.
